# Supplementary material for: A Comparative Normal Table of Anuran Development: Towards a Unified Framework for Xenopus and Non-Model Species
Source: Research Square preprint supplement (doi:10.21203/rs.3.rs-7700650/v1), 2025-09-25
Supplement: Supplementary file 1 [file 46a4e0627055ed06c81c2a3c.pdf]

| Stage Name                        | Gosner Stage (G);<br>Gosner, 1960 | <i>M. fissipes</i> Stage (S);<br>Wang et al., 2017 | <i>Xenopus</i> Stage (NF)<br>Nieuwkoop and Faber, 1956 | Trait description                                                                                          |                                                                                                   |
|-----------------------------------|-----------------------------------|----------------------------------------------------|--------------------------------------------------------|------------------------------------------------------------------------------------------------------------|---------------------------------------------------------------------------------------------------|
|                                   |                                   |                                                    |                                                        | Other anurans                                                                                              | <i>Xenopus</i>                                                                                    |
| Limb bud I                        | 26                                | 29                                                 | 46-48                                                  | Appearance of the hindlimb bud                                                                             |                                                                                                   |
| Limb bud II                       | 27                                | 30                                                 | 49                                                     | Hindlimb bud longer, distal outline still circular, length of hind limb=1/2 width                          |                                                                                                   |
| Limb bud III                      | 28                                | 31                                                 | 50                                                     | Length of hind limb= width                                                                                 |                                                                                                   |
| Limb bud IV                       | 29                                | 32                                                 | 51                                                     | Length of hind limb buds =3/2 width                                                                        |                                                                                                   |
| Appearance of knee junction       | 30                                | 32-33                                              | 52                                                     | Oar-shaped hindlimb bud formation                                                                          |                                                                                                   |
| Oar-shaped limb bud               | 31                                | 33                                                 | 52                                                     |                                                                                                            |                                                                                                   |
| Appearance of 4th and 5th toes I  | 32                                | 34                                                 | 53                                                     | Limb development and toe differentiation                                                                   |                                                                                                   |
| Appearance of 4th and 5th toes II | 33                                | 34                                                 | 53                                                     |                                                                                                            |                                                                                                   |
| Appearance of 3rd toe             | 34                                | 35                                                 | 54                                                     |                                                                                                            |                                                                                                   |
| Appearance of 1st and 2nd toes I  | 35                                | 36                                                 | 54                                                     |                                                                                                            |                                                                                                   |
| Appearance of 1st and 2nd toes II | 36                                | 36                                                 | 54                                                     |                                                                                                            |                                                                                                   |
| All toes completely separated     | 37                                | 37                                                 | 55                                                     | Limb growth                                                                                                |                                                                                                   |
| Metatarsal tubercle               | 38                                | 37-39                                              | 56-57                                                  |                                                                                                            |                                                                                                   |
| Subarticular tubercles            | 39                                | 40                                                 | 57                                                     | Fingers stretched out in forelimb atrium                                                                   |                                                                                                   |
| Disappearance of vent tube I      | 40                                | 40                                                 | 58                                                     | Maximum total length of tadpoles                                                                           | Forelimb eruption; small intestine at its maximum length, and tadpole at its maximum total length |
| Disappearance of vent tube II     | 41                                | 41                                                 | 59                                                     | Forelimbs were distinct and covered by transparent pectoral skin, and reached a position above the heart   | Forelimb reaching down to the base of hindlimb                                                    |
| Emergence of forelimbs            | 42                                | 42                                                 | 60-61                                                  | Forelimb eruption; head narrowed                                                                           | The head narrowed; the forelimb at the level of posterior of heart                                |
| Tail degeneration I               | 43                                | 42-43                                              | 62                                                     | Forelimb at the level of the middle of heart; head broader than trunk                                      |                                                                                                   |
| Tail degeneration II              | 44                                | 43                                                 | 63                                                     | Head narrower than trunk, tail still slightly longer than body, forelimb at the level of anterior of heart |                                                                                                   |
| Tail degeneration III             | 45                                | 44                                                 | 64-65                                                  | Tail continued to degenerate into a stub                                                                   |                                                                                                   |
| Complete metamorphosis            | 46                                | 45                                                 | 66                                                     | Tail resorption is complete; the tadpole became a froglet                                                  |                                                                                                   |
