# Supplementary material for: A Comparative Normal Table of Anuran Development: Towards a Unified Framework for Xenopus and Non-Model Species
Source: Research Square preprint supplement (doi:10.21203/rs.3.rs-7700650/v1), 2025-09-25
Supplement: Supplementary file 3 [file 5e5649ea77f1f261d9c7f3c8.pdf]

| Stage Name                        | Gosner Stage (G);<br>Gosner, 1960 | <i>M. fissipes</i> Stage (S);<br>Wang et al., 2017 | <i>Xenopus</i> Stage (NF);<br>Nieuwkoop and Faber, 1956 | Trait description                                                                                                |                |
|-----------------------------------|-----------------------------------|----------------------------------------------------|---------------------------------------------------------|------------------------------------------------------------------------------------------------------------------|----------------|
|                                   |                                   |                                                    |                                                         | Other anurans                                                                                                    | <i>Xenopus</i> |
| Fertilized egg                    | 1                                 | 1                                                  | 1                                                       | Animal pole was rotated upward from random initial orientations                                                  |                |
| Appearance of gray crescent       | 2                                 | 2                                                  | 1                                                       | A lightening (grey crescent) appears on part of the pigmented hemisphere opposite the point of sperm penetration |                |
| First cleavage (2 cells)          | 3                                 | 3                                                  | 2                                                       | Different cells were formed by cleavage, such as 2 cells, 4 cells, 8 cells, 16 cells, and 32 cells               |                |
| Second cleavage (4 cells)         | 4                                 | 4                                                  | 3                                                       |                                                                                                                  |                |
| Third cleavage (8 cells)          | 5                                 | 5                                                  | 4                                                       |                                                                                                                  |                |
| Fourth cleavage (16 cells)        | 6                                 | 6                                                  | 5                                                       |                                                                                                                  |                |
| Fifth cleavage (32 cells)         | 7                                 | 7                                                  | 6                                                       | Cell size gets smaller                                                                                           |                |
| Early blastula                    | 8                                 | 8-9                                                | 7                                                       |                                                                                                                  |                |
| Late blastula                     | 9                                 | 10                                                 | 8                                                       | Boundaries between cells became blurry, creating a smooth surface                                                |                |
| Appearance of blastoporic lip     | 10                                | 11                                                 | 9                                                       | Invagination was initiated in the vegetal hemisphere cells                                                       |                |
| Mid-gastrula                      | 11                                | 12-13                                              | 10                                                      | Formation of circular blastopore                                                                                 |                |
| Late-gastrula                     | 12                                | 14                                                 | 11-13                                                   | Yolk plug became smaller                                                                                         |                |
| Neural plate                      | 13                                | 15                                                 | 14                                                      | Yolk plug was disappeared, a horseshoe-shaped embryo was formed                                                  |                |
| Neural folds                      | 14                                | 16                                                 | 15-17                                                   | Neural groove became distinct                                                                                    |                |
| Rotation (Closure of neural fold) | 15                                | 17                                                 | 18                                                      | Neural fold merged into the whole trunk                                                                          |                |
| Neural tube                       | 16                                | 18                                                 | 19-21                                                   | Embryo elongation, two lateral ridges elevation and separated by the neural groove                               |                |
| Tail bud                          | 17                                | 19                                                 | 22-25                                                   | Tail bud appears and develops                                                                                    |                |
| Muscular response                 | 18                                | 20-21                                              | 26-32                                                   | Both dorsal and ventral portions of the tail fin appeared                                                        |                |
| Heart beats                       | 19                                | 22                                                 | 33-34                                                   | Appearance of gill bud, formation of the optic vesicles on both sides of the head; heartbeats is detectable      |                |
| Gill circulation                  | 20                                | 23                                                 | 35-36                                                   | Optic vesicles are distinct, individuals prefer to lie on the bottom                                             |                |
| Cornea transparent                | 21                                | 23-24                                              | 37-38                                                   | Development of the gills, appearance and stretching of the gills                                                 |                |
| Tail fin circulation              | 22                                | 24                                                 | 39-41                                                   | Fins become transparent, blood circulation in the tails begins                                                   |                |
| Operculum development I           | 23                                | 25                                                 | 42                                                      | Development of the operculum and disappearance of external gills                                                 |                |
| Operculum development II          | 24                                | 26                                                 | 44                                                      |                                                                                                                  |                |
| Operculum development III         | 25                                | 27-28                                              | 45                                                      | Onset of feeding and free-swimming tadpole stage                                                                 |                |
