# Supplementary figures and images for: A Comparative Normal Table of Anuran Development: Towards a Unified Framework for Xenopus and Non-Model Species
Source: Research Square preprint supplement (doi:10.21203/rs.3.rs-7700650/v1), 2025-09-25

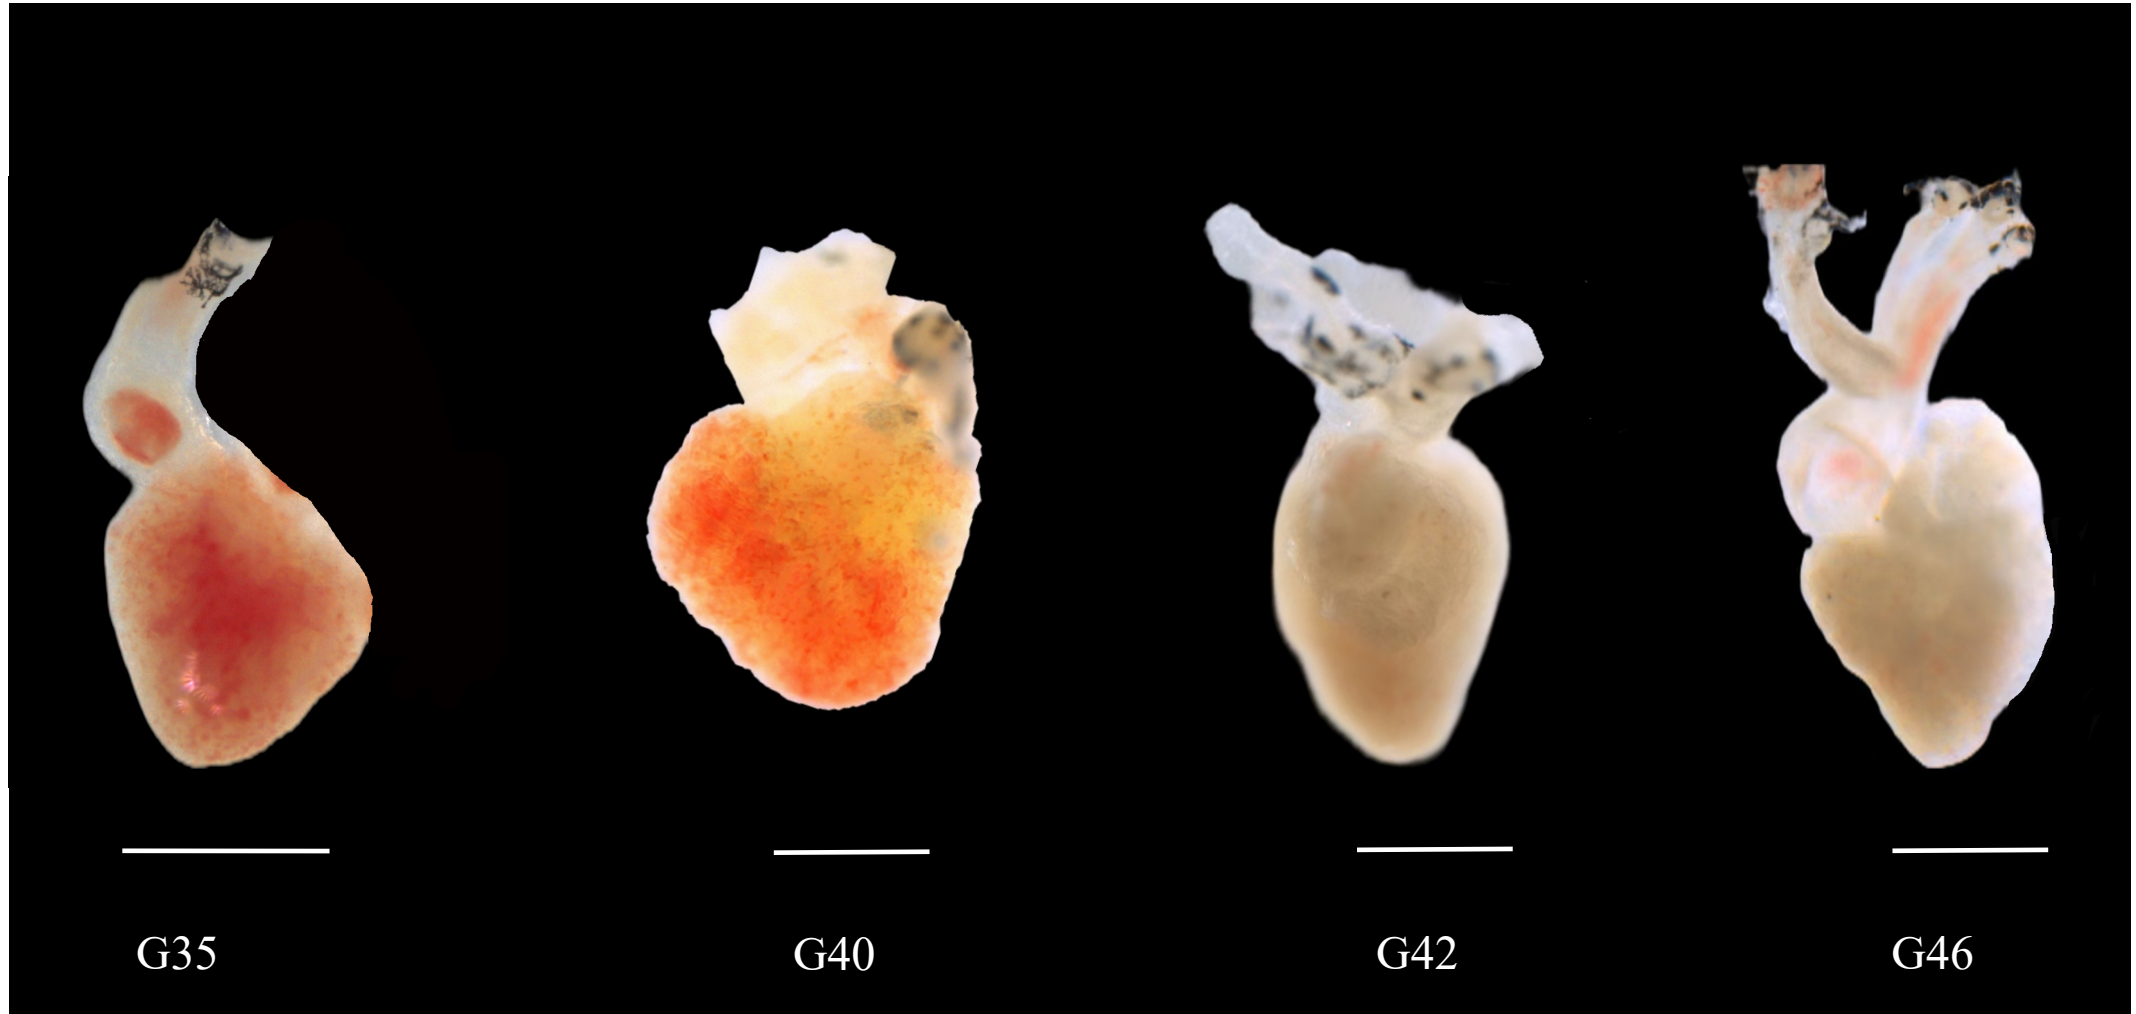

**Fig.S1.** Cardiac morphological changes in *Odorrana tormota* during metamorphosis; scale bar is 0.5 mm.

Supplement: Supplementary file 2 [file 47eea7fb4f21830f7aa04b4c.pdf]
